# Supplementary material for: Untargeted Analysis of Lemna minor Metabolites: Workflow and Prioritization Strategy Comparing Highly Confident Features between Different Mass Spectrometers
Source: MDPI journal article supplement (doi:10.3390/metabo11120832), 2021-12-02
Supplement: s1 [file s1]

## **Untargeted analysis of *Lemna minor* metabolites: Workflow and prioritization strategy comparing highly confident features between different mass spectrometers**

Rofida Wahman<sup>1,2</sup>, Stefan Moser<sup>3</sup>, Stefan Bieber<sup>4</sup>, Catarina Cruzeiro<sup>5</sup>, Peter Schröder<sup>5</sup>, August Gilg<sup>6</sup>, Frank Lesske<sup>6</sup>, and Thomas Letzel<sup>1,4\*</sup>

- 1 Chair of Urban Water Systems Engineering, Technical University of Munich, Am Coulombwall 3, 85748 Garching, Germany.
- 2 Pharmacognosy Department, Faculty of Pharmacy, Assiut University, Assiut, Arab Republic of Egypt/Egypt.
- 3 Stefan Moser Process Optimization, Weberweg 3, D-83131 Nußdorf am Inn, Germany
- 4 Analytisches Forschungsinstitut für Non-Target Screening GmbH (AFIN-TS), Am Mittleren Moos 48, 86167 Augsburg, Germany.
- 5 German Research Center for Environmental Health, Research Unit Comparative Microbiome Analysis, Helmholtz Centrum Munich, Ingolstädter Strasse 1, 85764 Neuherberg, Germany
- 6 University of Applied Sciences, Am Hofgarten 4, 85354 Freising, Weihenstephan, Germany

\*Correspondence: t.letzel@afin-ts.de

Table S1: The compounds of *Lemna minor* metabolic profile identified in the different samples which have been measured with System A and B

| Compound name                        | System A  |           | System B  |           |
|--------------------------------------|-----------|-----------|-----------|-----------|
|                                      | RT (Min)_ | Mass (Da) | RT (Min)_ | Mass (Da) |
| <b>Tyrosine</b>                      | 12.2      | 181.08    | 12.0      | 181.08    |
| <b>Aspartic acid</b>                 | 12.9      | 133.04    | 12.7      | 133.04    |
| <b>Phenylalanine</b>                 | 10.7      | 165.08    | 11.1      | 165.09    |
| <b>Tryptophan</b>                    | 11.4      | 204.10    | 11.7      | 204.10    |
| <b>Valine</b>                        | 11.6      | 117.08    | 11.9      | 117.09    |
| <b>L-alanine</b>                     | 13.1      | 89.05     | 13.2      | 89.05     |
| <b>Serine</b>                        | 13.5      | 105.04    | 13.8      | 105.05    |
| <b>L-isoleucine</b>                  | 10.9      | 131.10    | 11.2      | 131.10    |
| <b>L-proline</b>                     | 12.4      | 115.07    | 12.4      | 115.07    |
| <b>Niacin</b>                        | 7.6       | 123.04    | 7.8       | 123.04    |
| <b>Apigenin-6,8-diglucopyranosid</b> | 15.5      | 594.15    | 15.7      | 594.17    |

Table S2: The internal standards mean monoisotopic mass in Dalton, mean mass standard deviation (SD), mean retention times (RT; min), mean RT standard deviation (SD), and relative standard deviation (RSD) were listed.

| <b>Compound Name</b>                             | <b>Mean Mass (Da)</b> | <b>SD (Da)</b> | <b>RT Mean (Min)</b> | <b>SD RT (Min)</b> | <b>%RSD</b> |
|--------------------------------------------------|-----------------------|----------------|----------------------|--------------------|-------------|
| <b>2,4-Diamino-6-(hydroxymethyl)pteridine</b>    | 193.0837              | 0.0003         | 8.92                 | 0.09               | 1.04        |
| <b>6-Amino-1,3dimethyl-5-(formylamino)uracil</b> | 199.0831              | 0.0004         | 6.53                 | 0.09               | 1.31        |
| <b>Carbetamid</b>                                | 237.1239              | 0.0004         | 26.18                | 0.03               | 0.09        |
| <b>Chloridazon</b>                               | 222.0437              | 0.0006         | 24.9                 | 0.03               | 0.12        |
| <b>Chlorotoluron</b>                             | 213.0798              | 0.0007         | 27.66                | 0.03               | 0.10        |
| <b>Etilefrine</b>                                | 182.1181              | 0.0004         | 11.71                | 0.05               | 0.42        |
| <b>Famotidine</b>                                | 338.0530              | 0.0007         | 15.44                | 0.15               | 0.94        |
| <b>Metconazol</b>                                | 320.1539              | 0.0008         | 30.98                | 0.06               | 0.18        |
| <b>Metobromuron</b>                              | 259.0082              | 0.0007         | 28.60                | 0.03               | 0.11        |
| <b>Monuron</b>                                   | 199.0639              | 0.0006         | 26.65                | 0.02               | 0.09        |
| <b>Sotalol</b>                                   | 273.1276              | 0.0007         | 15.09                | 0.23               | 1.51        |
| <b>Vidarabine</b>                                | 268.1048              | 0.0006         | 9.69                 | 0.11               | 1.17        |

Table S3: The RTI calibration compounds mean monoisotopic mass of in Dalton, mean mass standard deviation (SD), mean RT (min), mean RT standard deviation (SD), and relative standard deviation (RSD) were listed.

| <b>Compound Name</b> | <b>Mean Mass (Da)</b> | <b>SD (Da)</b> | <b>RT Mean (Min)</b> | <b>SD RT (Min)</b> | <b>%RSD</b> |
|----------------------|-----------------------|----------------|----------------------|--------------------|-------------|
| <b>Metformin</b>     | 129.1007              | 0.001          | 14.26                | 0.09               | 0.7         |
| <b>Monuron</b>       | 199.0639              | 0.0006         | 26.65                | 0.02               | 0.09        |
| <b>Carbetamide</b>   | 237.1239              | 0.0004         | 26.18                | 0.03               | 0.09        |
| <b>Chloridazon</b>   | 222.0437              | 0.0006         | 24.9                 | 0.03               | 0.12        |
| <b>Chlorbromuron</b> | 291.9614              | 0              | 27.55                | 0.37               | 1.3         |
| <b>Metconazol</b>    | 320.1539              | 0.0008         | 30.98                | 0.06               | 0.18        |
| <b>Metobromuron</b>  | 259.0082              | 0.0007         | 28.60                | 0.03               | 0.11        |

Table S4: The list of red-marked compounds in the S-plot of Figure 4c.

| <b>Primary ID</b> | <b>Module<br/>p[1]</b> | <b>Module<br/>p(corr)[1]</b> | <b>Primary ID</b> | <b>Module<br/>p[1]</b> | <b>Module<br/>p(corr)[1]</b> |
|-------------------|------------------------|------------------------------|-------------------|------------------------|------------------------------|
| 602.11@25.5       | 0.01187                | 0.329627                     | 131.1@10.9        | 0.009783               | 0.501853                     |
| 327.22@10.3       | 0.011676               | 0.324272                     | 105.04@13.5       | 0.008167               | 0.412485                     |
| 245.16@13.1       | 0.011446               | 0.31758                      | 89.05@13.1        | 0.007009               | 0.357503                     |
| 133.04@12.9       | 0.009959               | 0.520567                     | 167.08@07.9       | 0.006478               | 0.180549                     |
| 123.04@7.6        | 0.010238               | 0.527519                     | 181.08@12.2       | 0.005688               | 0.278633                     |
| 204.1@11.4        | 0.010192               | 0.52508                      | 211.16@14.0       | 0.005578               | 0.154208                     |
| 117.09@11.6       | 0.010191               | 0.528166                     | 115.07@12.4       | 0.005334               | 0.293226                     |
| 165.08@10.9       | 0.01018                | 0.528748                     | 273.19@12.4       | 0.005309               | 0.147462                     |
| 283.22@14.0       | 0.009988               | 0.276824                     | 287.18@11.9       | 0.003642               | 0.102415                     |
| 347.27@24.8       | 0.009973               | 0.277353                     | 509.32@14.7       | 0.000496               | 0.012598                     |

Table S5: The proposed compounds in the HILIC part of *Lemna minor* metabolic profile by the PLANT-IDENT database, which were detected in system A and B data

| ID | Best match | Weighted Score | Mass Screening Score | Target RT | Target mass | $\Delta$ mass | Name          | Elemental formula                                             | logD at pH=7 | Category             |
|----|------------|----------------|----------------------|-----------|-------------|---------------|---------------|---------------------------------------------------------------|--------------|----------------------|
| 1  | false      | 0.45           | 0.45                 | 11.73     | 204.0899    | -0.0001       | Tryptophan    | C <sub>11</sub> H <sub>12</sub> N <sub>2</sub> O <sub>2</sub> | -1.09        | Lemnaceae or Araceae |
| 2  | true       | 0.35           | 0.35                 | 13.13     | 133.0373    | -0.0002       | Aspartic acid | C <sub>4</sub> H <sub>7</sub> NO <sub>4</sub>                 | -5.37        | Brassicaceae         |
| 3  | true       | 0.05           | 0.05                 | 12.69     | 89.0476     | -0.0004       | Alanine       | C <sub>3</sub> H <sub>7</sub> NO <sub>2</sub>                 | -2.84        | Lemnaceae or Araceae |
| 4  | true       | 0.41           | 0.41                 | 11.59     | 117.0789    | -0.0001       | Valine        | C <sub>5</sub> H <sub>11</sub> NO <sub>2</sub>                | -1.95        | Nymphaeaceae         |
| 5  | true       | 0.41           | 0.41                 | 11.59     | 117.0789    | -0.0001       | Betaine       | C <sub>5</sub> H <sub>11</sub> NO <sub>2</sub>                | -3.72        | Bocconia frutescens  |

## Supplementary information to the manuscript

FOR-IDENT LC

Molecular Screening (Hidden-Target Screening/ Suspected-Target Screening/ Known Unknowns)

Process

Required data available: ✔ or ✘  
Processing activated: ✔ or ✘

Parameters

pH: 7.0

ppm precursor ion: 5.0

ppm fragment ions: 5.0

Intensity threshold: 5

Ion species: +H

Stationary phase: C18

Source Lists

☒ Select/Deselect all

☐ STOFF-IDENT

☒ PLANT-IDENT

☐ PFC-IDENT

Last processed

LCM\_HILIC\_F1.M

LCM\_HILIC\_F1.M

Results

Search content Help

found 169, 169 visible

| Details | Target           | RT   | Result name      | Score | Mass | MS/MS | Mass | Pathw... |
|---------|------------------|------|------------------|-------|------|-------|------|----------|
| details | 150.1/7.8 (...)  | 7.9  | Gentianidine     | ●     |      |       |      | X        |
| details | 212.2/13.6 (...) | 13.6 | Sibirine         | ●     |      |       |      | X        |
| details | 342.2/11.3 (...) | 11.3 | Predicantone     | ●     |      |       |      | X        |
| details | 342.2/11.3 (...) | 11.3 | Isoconpal...     | ●     |      |       |      | X        |
| details | 342.2/11.3 (...) | 11.3 | Isoconidine      | ●     |      |       |      | X        |
| details | 342.2/11.3 (...) | 11.3 | N-Methyla...     | ●     |      |       |      | X        |
| details | 342.2/11.3 (...) | 11.3 | Cordine          | ●     |      |       |      | X        |
| details | 342.2/11.3 (...) | 11.3 | Thalidomide...   | ●     |      |       |      | X        |
| details | 166.1/11.0 (...) | 11.1 | Phenylalanine... | ●     |      |       |      | X        |
| details | 100.1/7.0 (B)    | 6.9  | N-Methylpyr...   | ●     |      |       |      | X        |
| details | 206.1/8.2 (...)  | 8.2  | methyl 2-ox...   | ●     |      |       |      | X        |
| details | 218.1/12.5 (...) | 12.5 | N-gamma...       | ●     |      |       |      | X        |
| details | 302.2/9.6 (...)  | 9.7  | Trachelant...    | ●     |      |       |      | X        |
| details | 333.1/10.2 (...) | 10.2 | 1-(2,5-dihy...   | ●     |      |       |      | X        |
| details | 147.1/6.6 (...)  | 6.7  | H-DL-Gln-OH      | ●     |      |       |      | X        |
| details | 182.1/8.2 (...)  | 8.2  | Tyrosine         | ●     |      |       |      | X        |
| details | 355.1/7.1 (...)  | 7.1  | 3-(3-Cl,4-Cl...  | ●     |      |       |      | X        |
| details | 123.1/7.7 (...)  | 7.6  | Aminocotinine    | ●     |      |       |      | X        |
| details | 212.2/12.7 (...) | 12.8 | Sibirine         | ●     |      |       |      | X        |
| details | 176.1/8.8 (...)  | 8.9  | Gentianidine     | ●     |      |       |      | X        |
| details | 209.1/8.4 (...)  | 8.5  | 2,4,5-trimet...  | ●     |      |       |      | X        |
| details | 209.1/8.4 (...)  | 8.5  | Sekishone        | ●     |      |       |      | X        |
| details | 209.1/8.4 (...)  | 8.5  | Benzene, 1...    | ●     |      |       |      | X        |
| details | 194.1/5.2 (...)  | 6.3  | 2,6-dideoxy...   | ●     |      |       |      | X        |
| details | 123.1/5.8 (...)  | 6.0  | Aminocotinine    | ●     |      |       |      | X        |
| details | 136.1/14.4 (...) | 14.5 | Vitamin B4       | ●     |      |       |      | X        |
| details | 120.1/13.4 (...) | 13.4 | Allothreoside... | ●     |      |       |      | X        |

(a)

FOR-IDENT DEV

Molecular Screening (Hidden-Target Screening/ Suspected-Target Screening/ Known Unknowns)

Process

MassBank entry available: ✔ or ✘  
Required data available: ✔ or ✘  
Processing activated: ✔ or ✘

Parameters

pH: 7.0

ppm precursor ion: 10.0

ppm fragment ions: 10.0

Intensity threshold: 0

Ion species: +H

Stationary phase: C18

Source Lists

☒ Select/Deselect all

☐ Stoffident

☒ Plantident

Last processed

L10d\_90M\_RT.xlsx

Results

Search content Help

found 17, 17 visible

| RTI Screening | pH dep | RTI   | logD DB | logD RTI | Δ logD (RTI-DB) | adj logD RTI | Δ logD (adj -DB) | Substance         | CAS Number |
|---------------|--------|-------|---------|----------|-----------------|--------------|------------------|-------------------|------------|
|               |        | 139.7 | 5.02    | 4.32     | -0.70           | 5.32         | 0.30             | 554-73-8          |            |
|               |        | 139.7 | 2.66    | 4.32     | 1.66            | 3.32         | 0.66             | 20316-84-1,6730-  |            |
|               |        | 146.3 | 1.66    | 4.75     | 3.09            | 3.75         | 2.09             | 6619-97-2         |            |
|               |        |       | 6.65    |          |                 |              |                  | 123953-55-9       |            |
|               |        |       | 4.42    |          |                 |              |                  | 506-32-1,6610-25  |            |
|               |        | 96.0  | 1.46    | 1.56     | 0.10            | 1.56         | 0.10             | 14484-90-5        |            |
|               |        | 126.1 | 2.66    | 3.47     | 0.81            | 2.47         | -0.19            | 20316-84-1,6730-  |            |
|               |        | 126.1 | 5.02    | 3.47     | -1.55           | 4.47         | -0.55            | 554-73-8          |            |
|               |        |       | 6.65    |          |                 |              |                  | 123953-55-9       |            |
|               |        |       | 4.42    |          |                 |              |                  | 506-32-1,6610-25  |            |
|               |        | 72.6  | -0.20   | 0.07     | 0.27            | -0.93        | -0.73            | 5599-49-9,61-50-7 |            |
|               |        |       | 4.46    |          |                 |              |                  | 20913-07-9        |            |
|               |        | 103.2 | 1.96    | 2.01     | 0.05            | 2.01         | 0.05             | 1177-14-6,21453-  |            |
|               |        | 62.3  | 1.42    | -0.58    | -2.00           | -0.58        | -2.00            | 102-46-5,10472-8  |            |
|               |        |       | 6.65    |          |                 |              |                  | 123953-55-9       |            |
|               |        |       | 4.42    |          |                 |              |                  | 506-32-1,6610-25  |            |
|               |        | 93.6  | 1.96    | 1.40     | -0.56           | 1.40         | -0.56            | 1177-14-6,21453-  |            |

(b)

Figure S1: (a) Search for the feature masses, which were separated with the HILIC column from the 100% MeOH extract; (b) RTI handling according to the pH of the compounds as the prioritization tool in PLANT-IDENT database in the FOR-IDENT platform for more information readers referred to the FOR-IDENT manual (<https://water.for-ident.org/#!home>).

Supplementary information to the manuscript

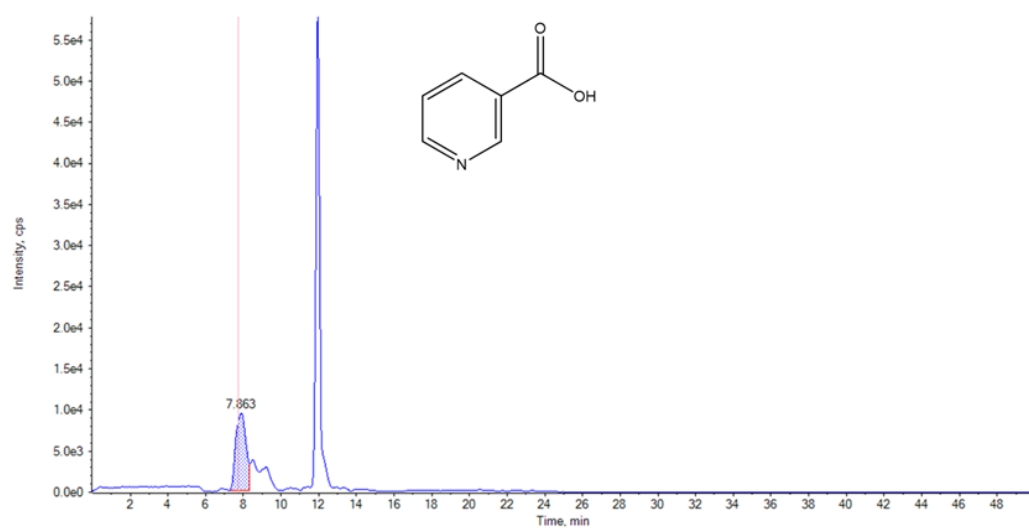

(a)

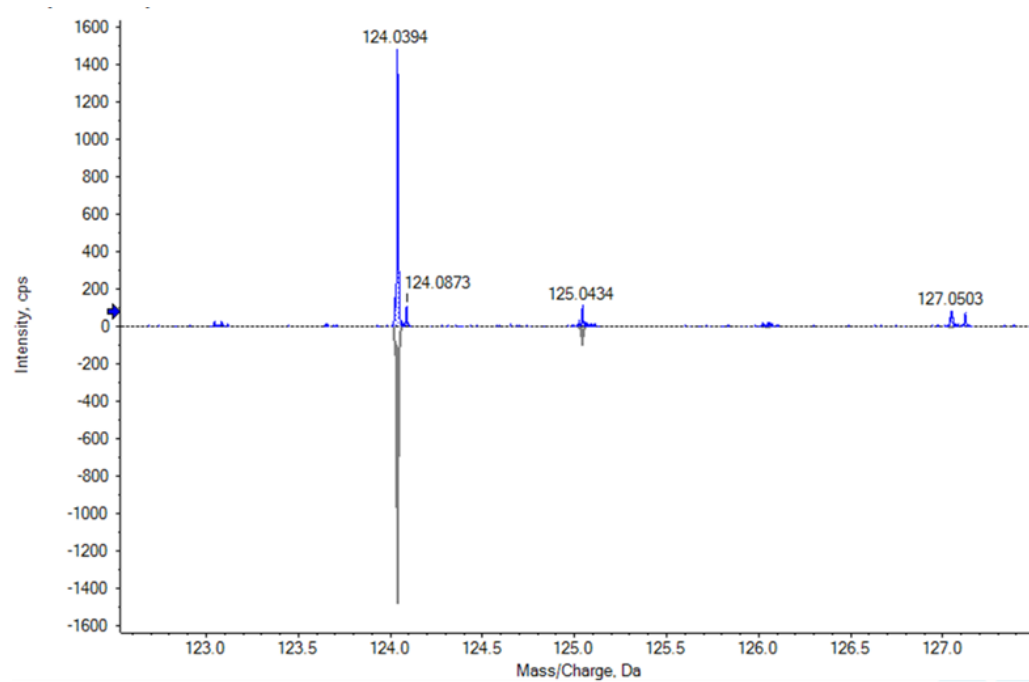

(b)



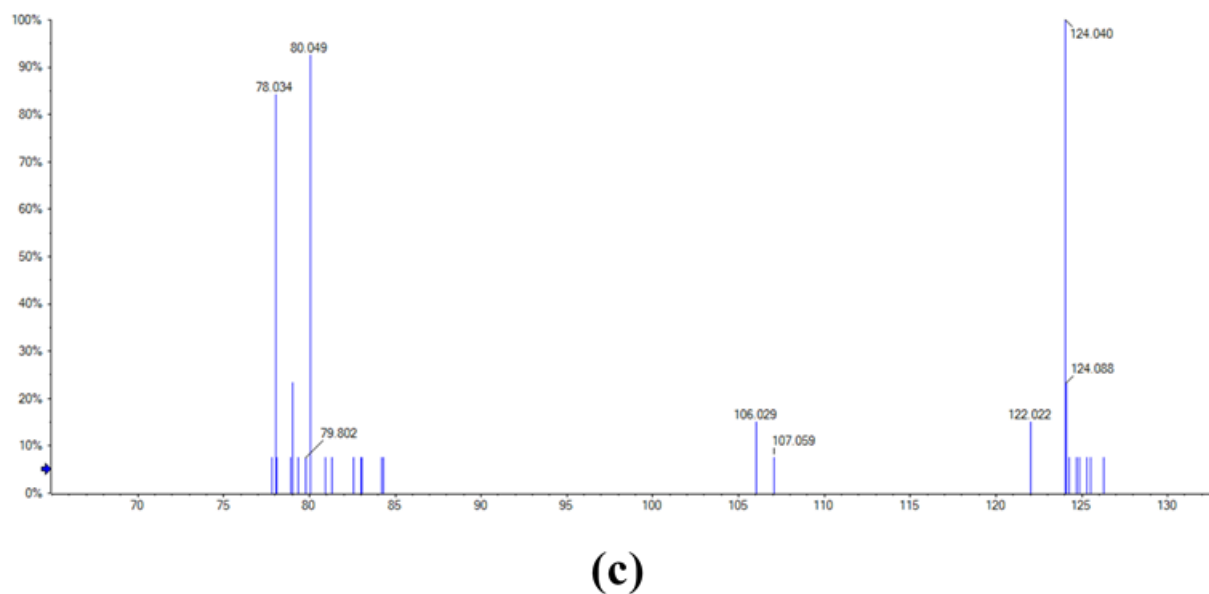

Figure S2: (a)-Extracted ion chromatogram (EIC) of niacin shows intensity ( $1.0 \times 10^4$ ) in counts per second (cps), appears on the y-axis, while RT appears on the x-axis; (b)-Mass Spectrum of niacin represents the masses and intensity of the ions with particular mass-to-charge ( $m/z$ ) values in Daltons; (c) - MS/MS spectrum of niacin shows the fragments and relative intensity (%).

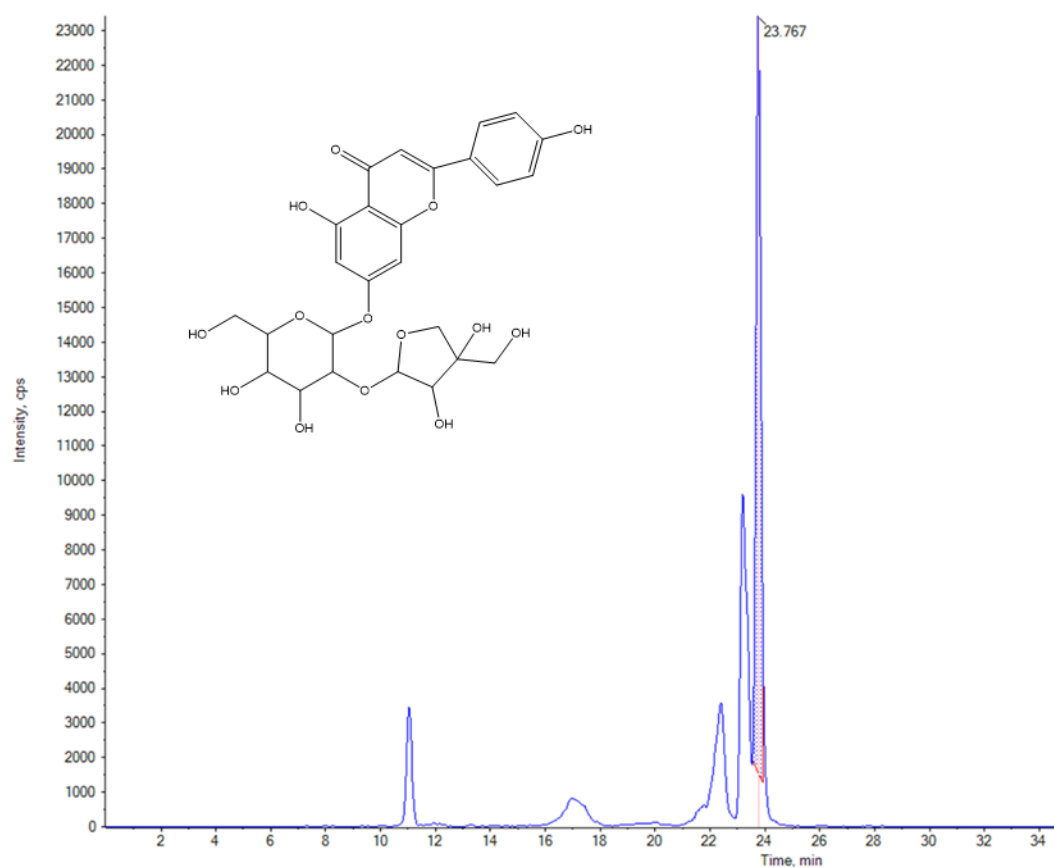

(a)

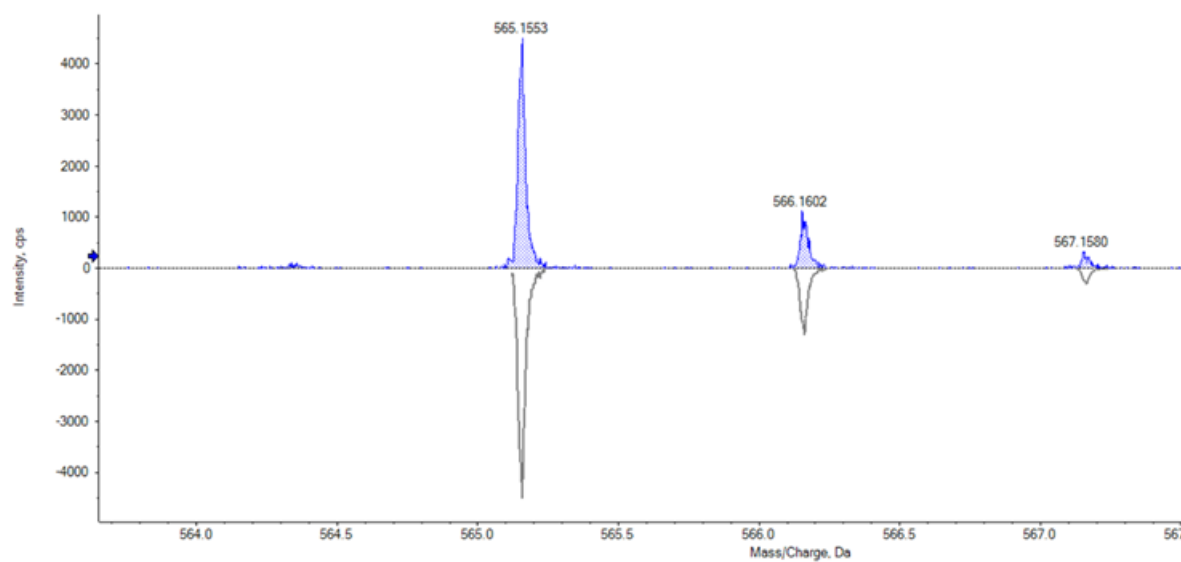

(b)

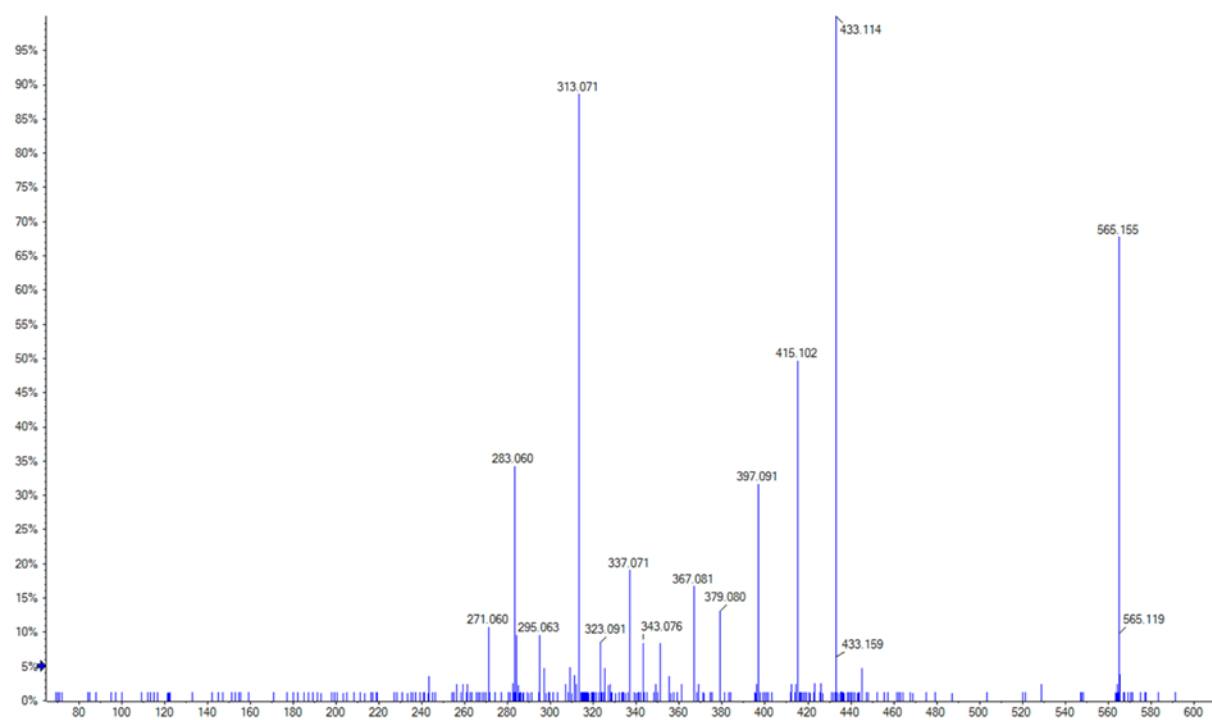

(c)

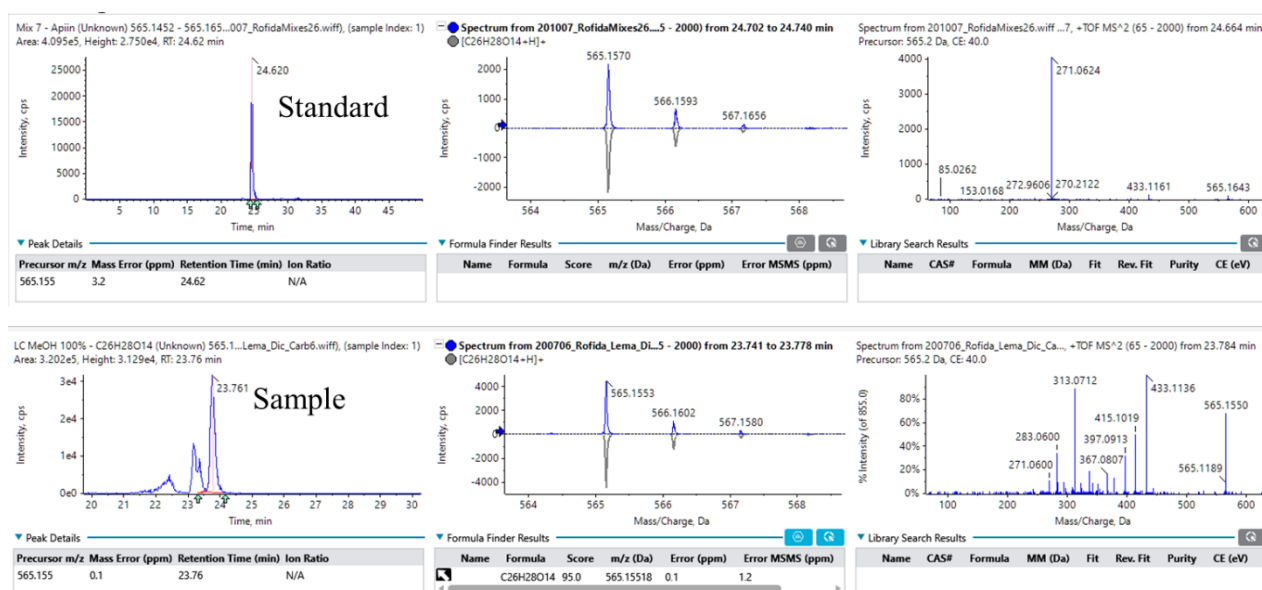

(d)

Figure S3: (a)-Extracted ion chromatogram (EIC) of apiin shows intensity in counts per second (cps), appears on the y-axis, while RT appears on the x-axis; (b)-Mass Spectrum of apiin represents the masses and intensity of the ions with particular mass-to-charge (m/z) values in Daltons; (c)- MS/MS spectrum of apiin shows the fragments and relative intensity (%); (d)- The EIC, mass Spectrum, and the MS/MS spectrum of apiin standard and sample.
